# Supplementary material for: Lysosomal dysfunction and overload of nucleosides in thymidine phosphorylase deficiency of MNGIE
Source: Springer Nature journal article supplement (doi:10.1186/s12967-024-05275-8), 2024-05-13

1 **Supplementary Information**

2 **Lysosomal dysfunction and overload of nucleosides in thymidine**  
3 **phosphorylase deficiency of MNGIE**

4  
5 Jixiang Du<sup>1,2,3</sup>, Fuchen Liu<sup>2</sup>, Xihan Liu<sup>4</sup>, Dandan Zhao<sup>2</sup>, Dongdong Wang<sup>2</sup>, Hongsheng Sun<sup>1,3</sup>,  
6 Chuanzhu Yan<sup>2,5,6,†</sup> and Yuying Zhao<sup>2,†</sup>

7 †These authors contributed equally to this work.

8  
9 Correspondence to:

10 Professor Yuying Zhao

11 Research Institute of Neuromuscular and Neurodegenerative Disease, Department of

12 Neurology, Qilu Hospital, Shandong University, West Wenhua Street No.107, Jinan, China,

13 250012

14 E-mail: [zyy72@126.com](mailto:zyy72@126.com)

15

16 Professor Chuanzhu Yan

17 Research Institute of Neuromuscular and Neurodegenerative Disease, Department of

18 Neurology, Qilu Hospital, Shandong University, West Wenhua Street No.107, Jinan, China,

19 250012

20 E-mail: [czyan@sdu.edu.cn](mailto:czyan@sdu.edu.cn)

21

1 **Supplementary Table 1 Antibodies used for Western blotting**

2 **Supplementary Table 2 Primers used for qPCR**

3 **Supplementary Table 3 mtDNA point mutations in the muscle sample of the MNGIE-1 patient**

4 **Supplementary Fig. 1 Expression of proteins related to the mitochondrial respiratory chain and**  
5 **mitophagy in the muscles of MELAS patients**

6 (A, B) Western blot analyses were performed on muscle tissue samples from m.3243A>G MELAS  
7 patients to determine the expression of proteins of the mitochondrial respiratory chain (A) and  
8 mitochondrial autophagy (B) using GAPDH as an internal reference. The numbers on the left indicate  
9 the corresponding molecular weight markers (kDa). Data are expressed as mean  $\pm$  standard deviation and  
10 were compiled from three independent experiments. Significance was determined using an unpaired two-  
11 tailed Student's t-test: \* $p < 0.05$ , \*\* $p < 0.01$ , \*\*\* $p < 0.001$ .

12

13 **Supplementary Fig. 2 The protein content of LAMP1 and SQSTM1 in the muscle sample of patient**  
14 **MNGIE-3**

15 (A) Western blot analysis was performed to determine the expression of lysosomal protein LAMP1 and  
16 autophagosome protein SQSTM1 in the muscle tissue samples of patient MNGIE-3 and controls, using  
17 GAPDH as an internal reference. The numbers on the left indicate the corresponding molecular weight  
18 markers (kDa). (B) Results of the relative quantification of the Western blot bands. (C) Quantification  
19 of the GAPDH band density of muscle samples of HC and MNGIE patients. Data are expressed as mean  
20  $\pm$  standard deviation and were compiled from three independent experiments. Significance was  
21 determined using an unpaired two-tailed Student's t-test: \* $p < 0.05$ , \*\* $p < 0.01$ , \*\*\* $p < 0.001$ .

22

23 **Supplementary Fig. 3 Magic red and acridine orange staining for MELAS fibroblasts.**

24 (A) Fluorescence imaging showed that Magic Red fluorescence intensity in MELAS fibroblasts had no  
25 significant changes compared to control cells. (B) Fluorescence imaging showed that there were no

1 significant changes in acridine orange fluorescence intensity in MELAS fibroblasts compared to control  
2 cells. (C) Quantitative analysis of the relative fluorescence intensity of Magic Red. (D) Quantitative  
3 analysis of the relative fluorescence intensity of acridine orange. The *p*-values were calculated using an  
4 unpaired two-tailed Student's t-test. Data are expressed as mean ± standard deviation (\* *p* <0.05, \*\* *p*  
5 <0.01, \*\*\* *p* <0.001).

6

7 **Supplementary Fig. 4 Lysosomal nucleoside level of 293T cell with thymidine and deoxyuridine**  
8 **treatment**

9 (A) 293T cell expressing TMEM192-3×HA was treated with 10 μM thymidine or deoxyuridine for 24 h.  
10 After treatment, lysosomes were isolated with Lyso-IP and performed nucleosides measurement with  
11 mass spectrometric analysis. The *p*-values were calculated using an unpaired two-tailed Student's t-test.  
12 Data are expressed as mean ± standard deviation (\* *p* <0.05, \*\* *p* <0.01, \*\*\* *p* <0.001).

13

14 **Supplementary Fig. 5 Disturbed mitochondrial homeostasis in cells treated with thymidine and**  
15 **deoxyuridine.**

16 (A) Flow cytometric analysis and relative quantification of JC-1 fluorescence intensity were performed  
17 on 293T cells treated with CCCP (positive control, 100 μM, 24 hours) and 80 μM thymidine or  
18 deoxyuridine for 24 hours. (B) ATP content in 293T cells decreased after 48 hours of treatment with 20  
19 μM and 80 μM thymidine or deoxyuridine. (C) Relative quantification analysis of mtDNA copy number  
20 by qPCR was performed on 293T cells treated with 20 μM and 80 μM thymidine or deoxyuridine for 48  
21 hours. (D) The level of mitochondrial superoxide increased in 293T cells after treatment with 20 μM and  
22 80 μM thymidine or deoxyuridine for 48 hours. The *p*-values were calculated using an unpaired two-  
23 tailed Student's t-test. Data are presented as mean ± standard deviation (\* *p* <0.05, \*\* *p* <0.01, \*\*\* *p*  
24 <0.001).

25

26 **Supplementary File 9 Uncropped original Western blots**

**Supplementary Table 1 Antibodies used for Western blotting**

| <b>Antibody</b>                          | <b>Host</b> | <b>Manufacturer</b> | <b>Cat No.</b> | <b>Dilution</b> |
|------------------------------------------|-------------|---------------------|----------------|-----------------|
| APG5L/ATG5 antibody                      | Rabbit      | Abcam               | ab108327       | 1:1000          |
| BNIP3L antibody                          | Rabbit      | Proteintech         | 12986-1-AP     | 1:1000          |
| cathepsin D (D-7):                       | Mouse       | Santa Cruz          | sc-377299      | 1:500           |
| Cathepsin B Polyclonal antibody          | Rabbit      | Proteintech         | 12216-1-AP     | 1:1000          |
| Citrate synthetase antibody              | Rabbit      | Abcam               | ab96600        | 1:1000          |
| CTSA                                     | Rabbit      | SAB                 | 42724          | 1:1000          |
| GAPDH antibody                           | Mouse       | Proteintech         | 10494-1-AP     | 1:5000          |
| HA-Tag (C29F4) Rabbit mAb                | Rabbit      | CST                 | 3724           | 1:1000          |
| LC3B antibody                            | Rabbit      | Abcam               | ab51520        | 1:1000          |
| MT-ATP6 antibody                         | Rabbit      | Abcam               | ab192423       | 1:1000          |
| MT-CYB antibody                          | Rabbit      | Abcam               | ab81215        | 1:1000          |
| ND4 antibody                             | Rabbit      | abclonal            | A9941          | 1:1000          |
| Ndufs4 antidody                          | Rabbit      | Abcam               | ab137064       | 1:1000          |
| p70 S6 Kinase                            | Rabbit      | CST                 | 2708           | 1:1000          |
| Parkin antibody                          | Mouse       | Abcam               | ab77924        | 1:1000          |
| PD-ECGF (PGF-44C)                        | Mouse       | Santa Cruz          | sc-47702       | 1:1000          |
| PGC1 alpha                               | Rabbit      | Abcam               | ab54481        | 1:1000          |
| PINK1 antibody                           | Rabbit      | Novus Biologicals   | BC100-494H     | 1:1000          |
| Recombinant Anti-NDUFS2 antibody         | Rabbit      | Abcam               | ab192022       | 1:1000          |
| SQSTM1/p62 antibody                      | Rabbit      | Abcam               | ab109012       | 1:1000          |
| TOMM20 antibody                          | Mouse       | Abcam               | ab56783        | 1:1000          |
| Total OXPHOS Rodent WB Antibody Cocktail | Mouse       | Abcam               | ab110413       | 1:1000          |
| Ubiquitin antibody                       | Rabbit      | Abcam               | ab7780         | 1:1000          |
| VDAC1/Porin antibody                     | Rabbit      | Abcam               | ab15895        | 1:1000          |
| $\beta$ -actin                           | Mouse       | Proteintech         | 66009-1-Ig     | 1:5000          |
| HRP Anti-Rabbit IgG H&L                  | Goat        | HuaAn Biotechnology | HA1001         | 1:5000          |
| HRP Anti-Mouse IgG H&L                   | Goat        | HuaAn Biotechnology | HA1006         | 1:5000          |

**Supplementary Table 2 Primers used for qPCR**

| <b>Primers</b> | <b>Sequences (5'to 3')</b> |
|----------------|----------------------------|
| SERPINA1-F     | CAGTGAATAAATGAGGCGTACATCC  |
| SERPINA1-R     | GACTGTTTCTCATGCCTCTGGAAAG  |
| SLCO2B1-F      | CCTGATGCCTAGGTTTCTTTTCTTG  |
| SLCO2B1-R      | GGTCATCTGCCTACCCTAGAAC     |
| mt-ND1-F       | TACGGGCTACTACAACCCTTC      |
| mt-ND1-R       | ATGGTAGATGTGGCGGGTTT       |
| mt-ND5-F       | CATTACTAACAAACATTTCCCCCGC  |
| mt-ND5-R       | GGCTGTGAGTTTTAGGTAGAGGG    |
| homo-LAMP1-    | TCTCAGTGAACACTACGACACCA    |
| homo-LAMP1-    | AGTGTATGTCCTCTTCCAAAAGC□   |
| h-LAMP2-F      | GCACAGTGAGCACAAATGAGT      |
| h-LAMP2-R      | CAGTGGTGTGTATGGTGGGT       |

**Supplementary Table 3 mtDNA point mutations in the muscle sample of the MNGIE-1 patient**

| <b>Gene</b> | <b>Nt position</b> | <b>Nucleotide change</b> | <b>Amino acid change</b> | <b>Report</b> |
|-------------|--------------------|--------------------------|--------------------------|---------------|
| None        | 310                | C insertion              | -                        | Yes           |
| ND2         | 4833               | A>G                      | T122A                    | Yes           |
| ND3         | 10398              | A>G                      | T114A                    | Yes           |
| CYTB        | 15043              | G>A                      | Syn                      | Yes           |
| CYTB        | 15784              | T>C                      | Syn                      | Yes           |
| CYTB        | 15884              | G>A                      | A380T                    | No            |
| tRNA-Pro    | 16183              | A>C                      | -                        | Yes           |
| tRNA-Pro    | 16189              | T>C                      | -                        | Yes           |

**Supplementary Fig. 1**

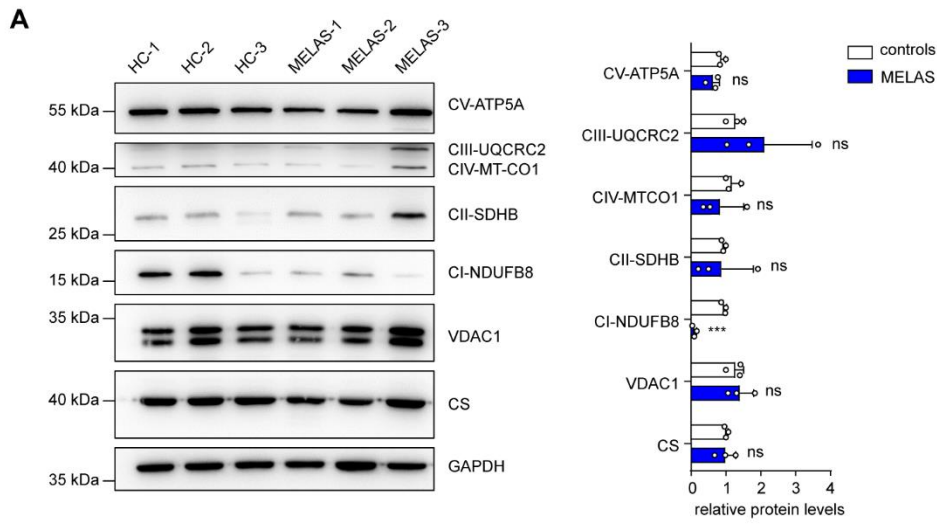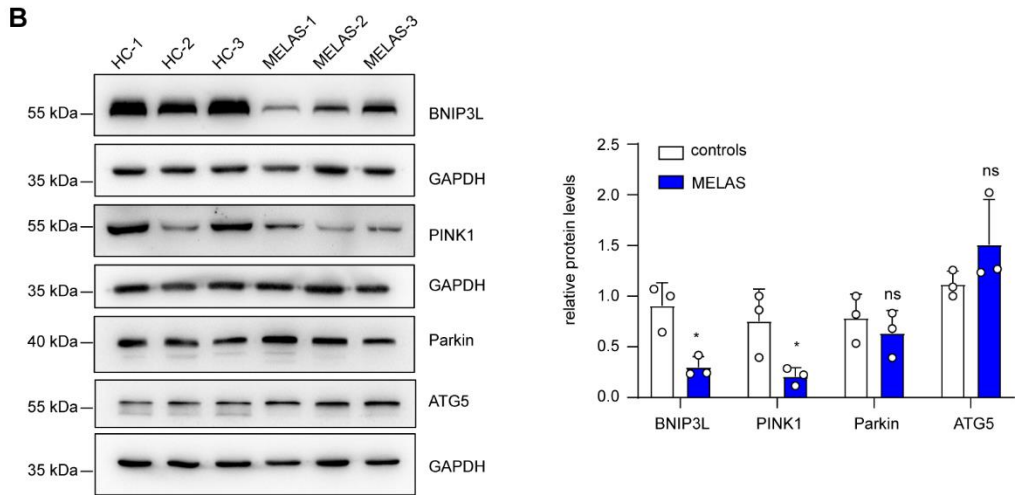

1

2

**Supplementary Fig. 2**

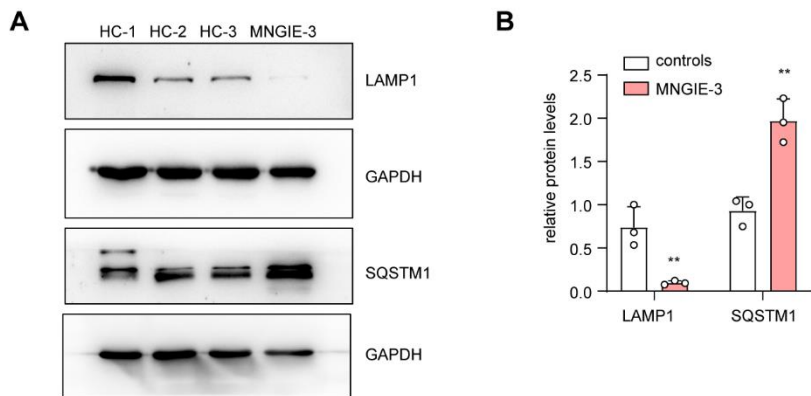

3

Supplementary Fig. 3

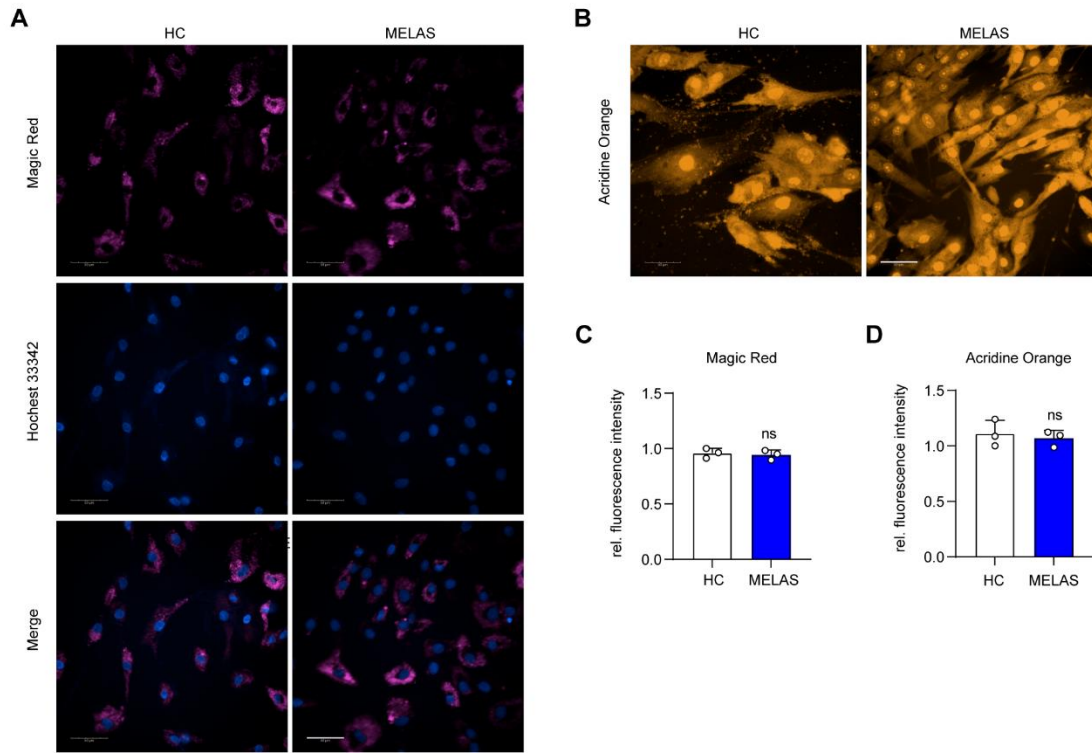

1

2

Supplementary Fig. 4

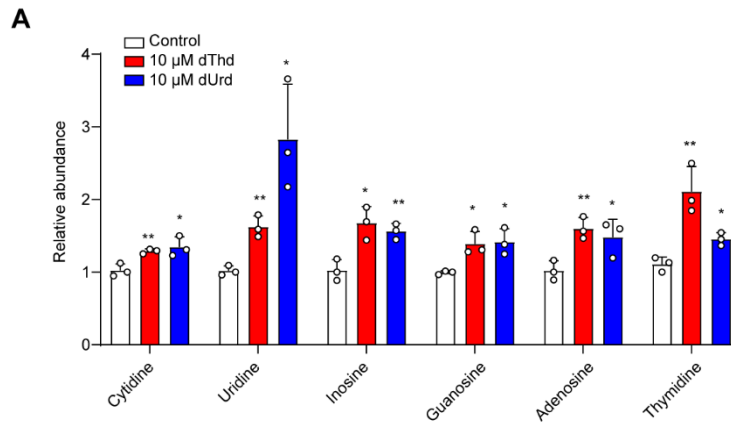

3



Supplementary Fig. 5

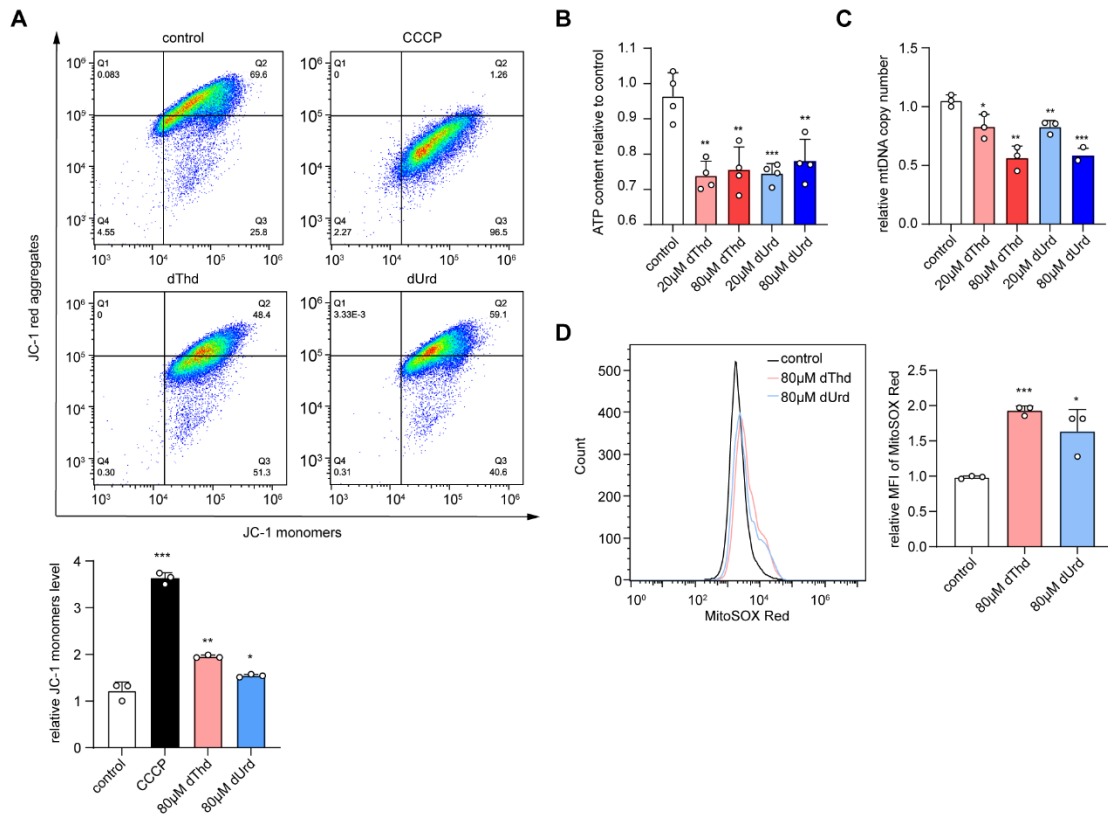

1 **Supplementary File 9 Uncropped original Western blots**

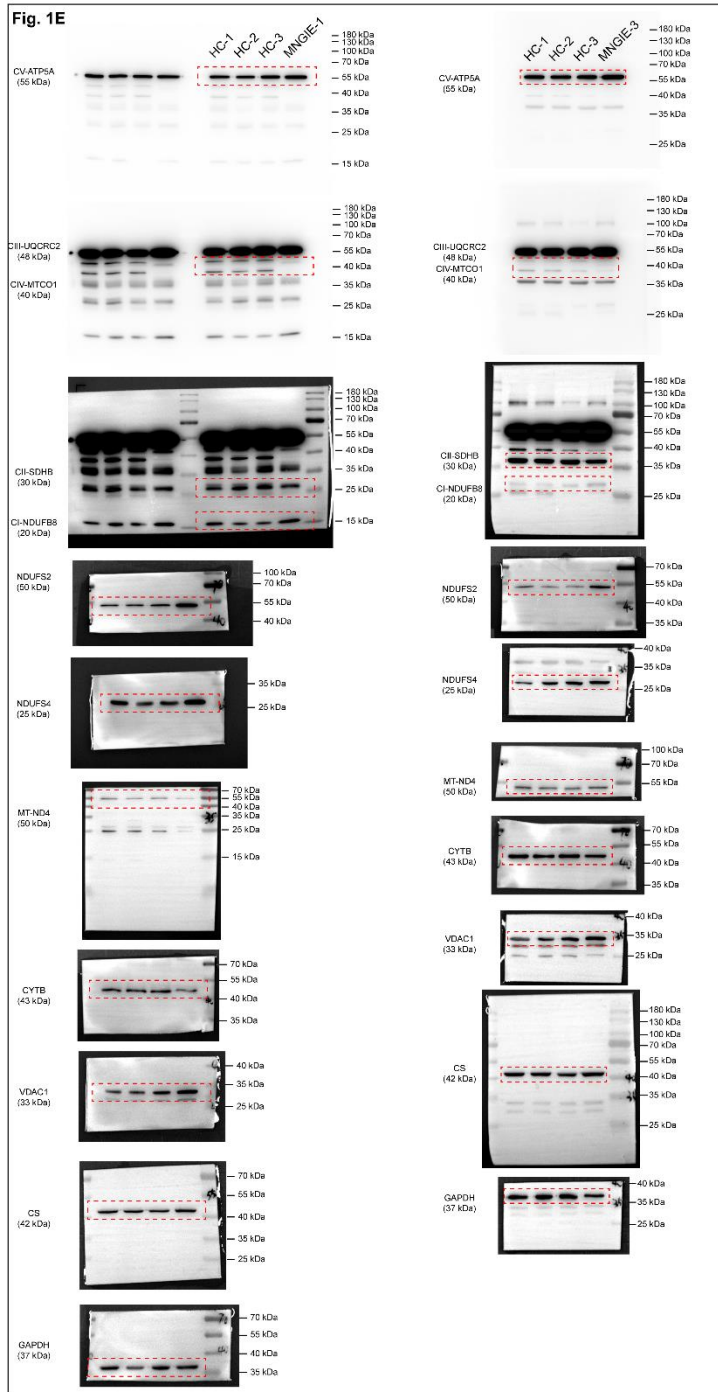

**Fig. 2A**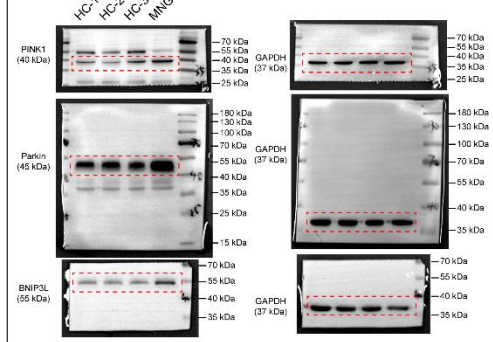**Fig. 2B**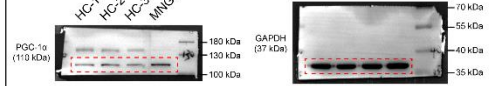**Fig. 2C**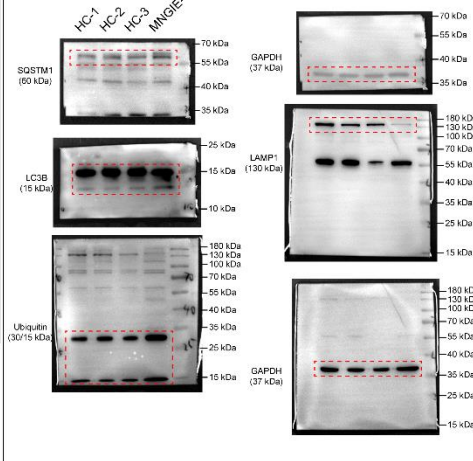**Fig. 2E**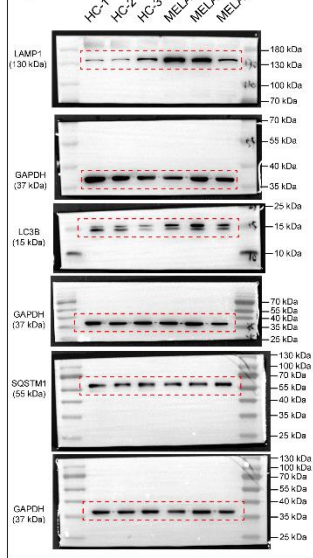**Fig. 2F**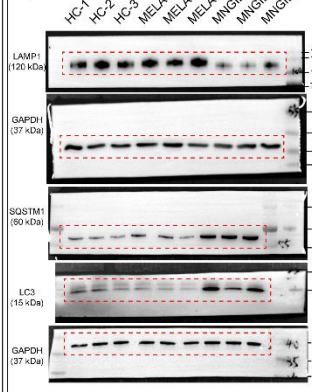**Fig. 3E**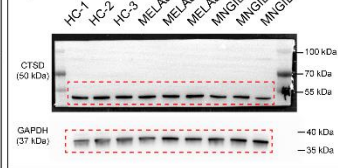**Fig. 4A**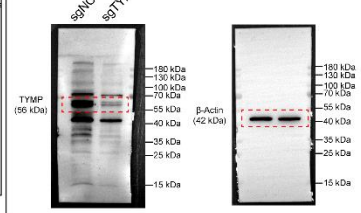**Fig. 4B**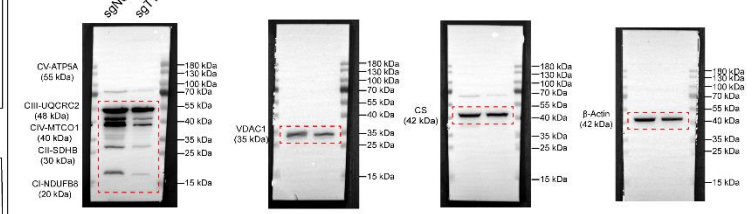**Fig. 4C**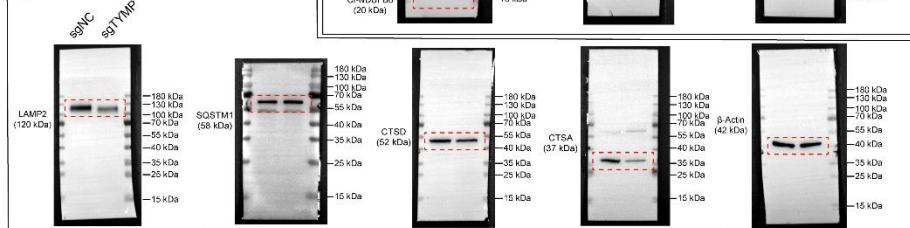

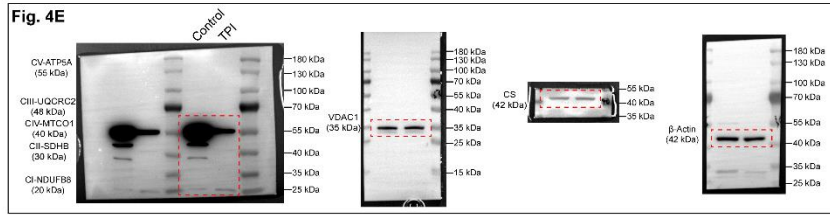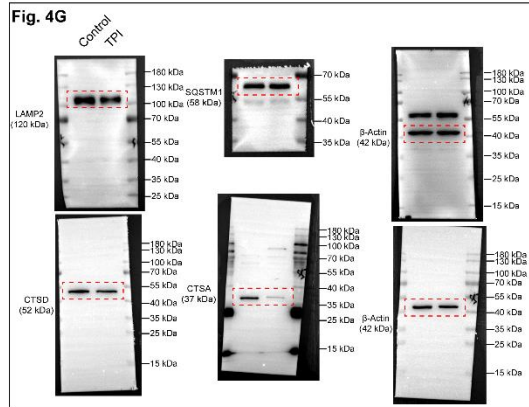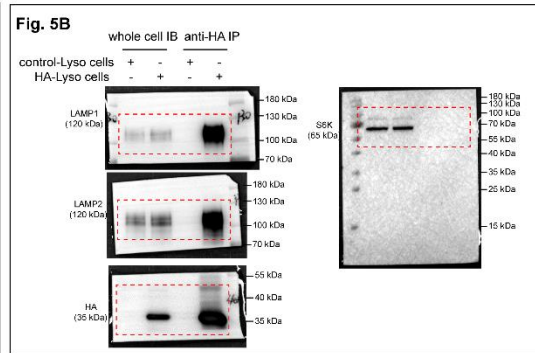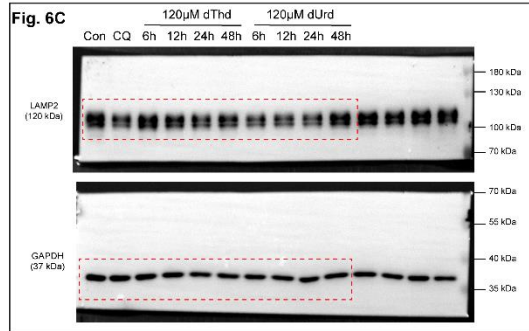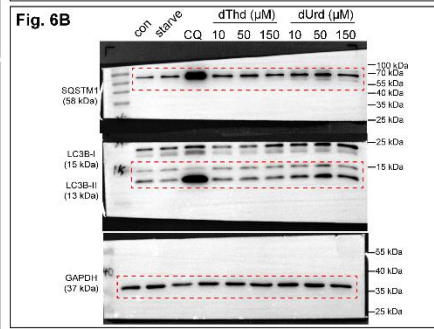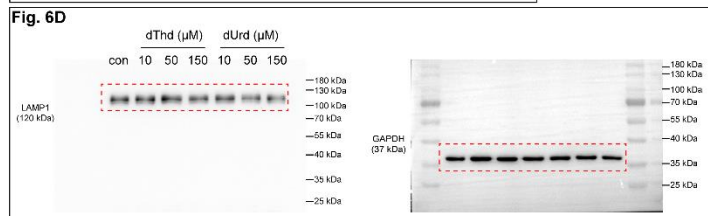

Supplementary Fig. S1A

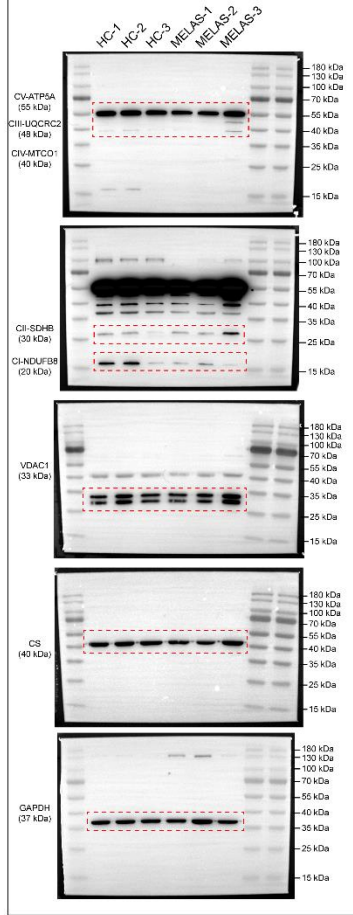

Supplementary Fig. S1B

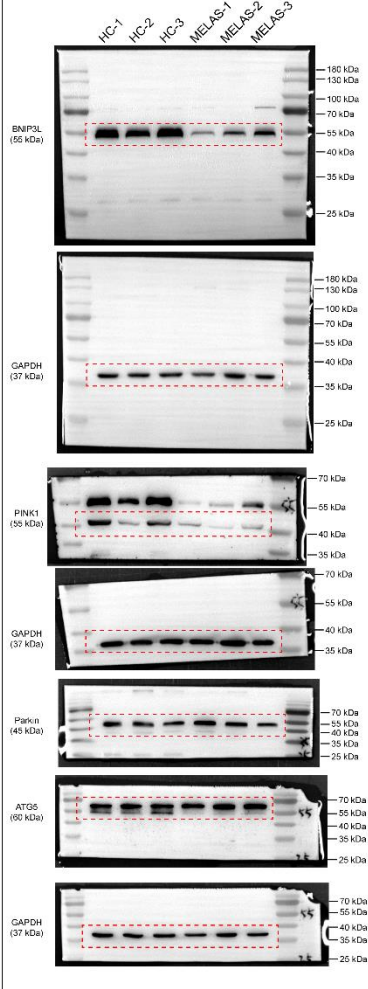

Supplementary Fig. S2A

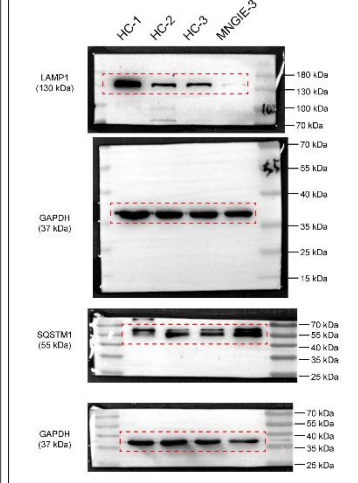

Supplement: MOESM1 [file 27084764]
